# Supplementary material for: Enhancing the light olefin selectivity of an iron-based Fischer–Tropsch synthesis catalyst by modification with CTAB
Source: Royal Society of Chemistry journal article supplement (doi:10.1039/c8ra04622k), 2018-01-01
Supplement: c8ra04622k1.pdf [file c8ra04622k1.pdf]

# Supporting Information

## Enhancing Light Olefins Selectivity of Iron-Based Fischer-Tropsch Synthesis Catalyst by the Modulation of CTAB

Chuanxue Zhu <sup>a</sup>, Yingxin Liu <sup>b</sup>, Chao Huo <sup>a,\*</sup>, Huazhang Liu <sup>a</sup>

<sup>a</sup> Institute of Industrial Catalysis, Zhejiang University of Technology, Hangzhou  
310032, Zhejiang, PR China

<sup>b</sup> Research and Development Base of Catalytic Hydrogenation, College of  
Pharmaceutical Science, Zhejiang University of Technology, Hang-zhou 310032,  
Zhejiang, PR China

\*Corresponding Author: Tel.: +86-571-88320815. Fax: +86-571-88320815, E-mail:  
chaohc@zjut.edu.cn

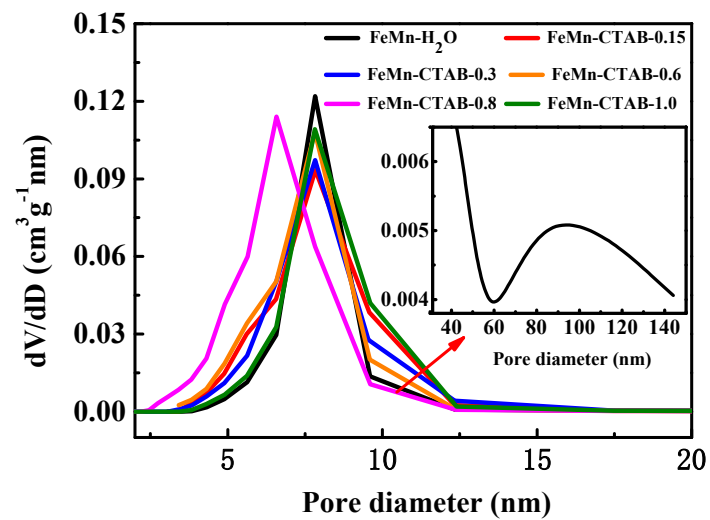

Fig. S1. Pore size distribution of the calcined FeMn catalyst with different addition of CTAB.

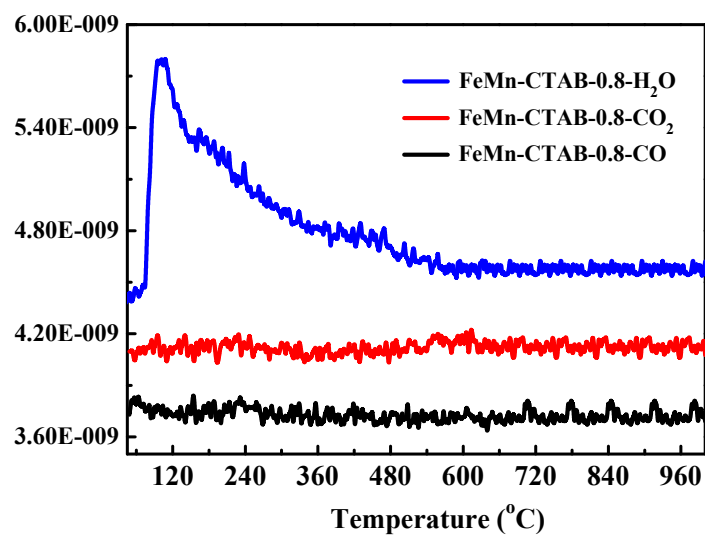

Fig. S2. TG-MS profiles of the calcined FeMn-CTAB-0.8 catalyst in air.

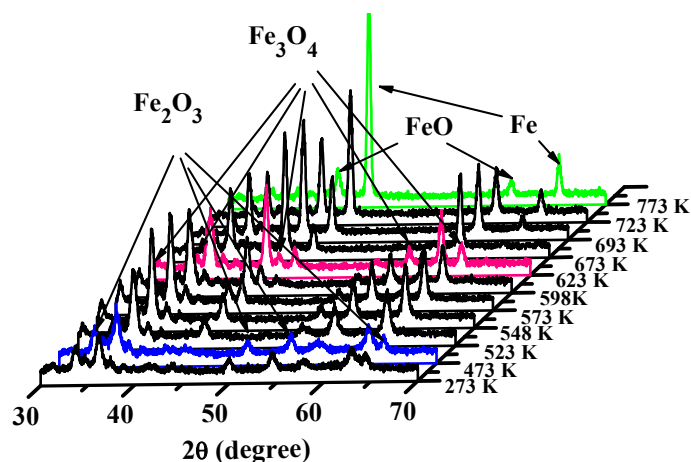

Fig. S3. *In-Situ* XRD patterns of the calcined FeMn-CTAB-0.8 catalyst.

Fig. S3 displays the *in-Situ* XRD patterns of FeMn-CTAB-0.8 recorded from 25 °C to 550 °C. It revealed that the reduction process of  $\alpha$ -Fe<sub>2</sub>O<sub>3</sub> to Fe<sub>3</sub>O<sub>4</sub> started at 275 °C and almost completed at 400 °C. The characteristic peaks intensity of Fe<sub>3</sub>O<sub>4</sub> phase at  $2\theta=53.4, 56.9^\circ$  (PDF#88-0315) gradually decreased from 300 °C to 425 °C as observed. At the same time, the peaks of FeO phase at  $2\theta=41.921, 60.74^\circ$  (PDF#06-0615) had emerged at 400 °C, indicating that the Fe<sub>3</sub>O<sub>4</sub> phase was transformed into FeO. Moreover, the metallic Fe phase can be found at 450 °C with the growth of its nanoparticles size when temperature was further raised. No crystal phase detected for the manganese oxides phase.

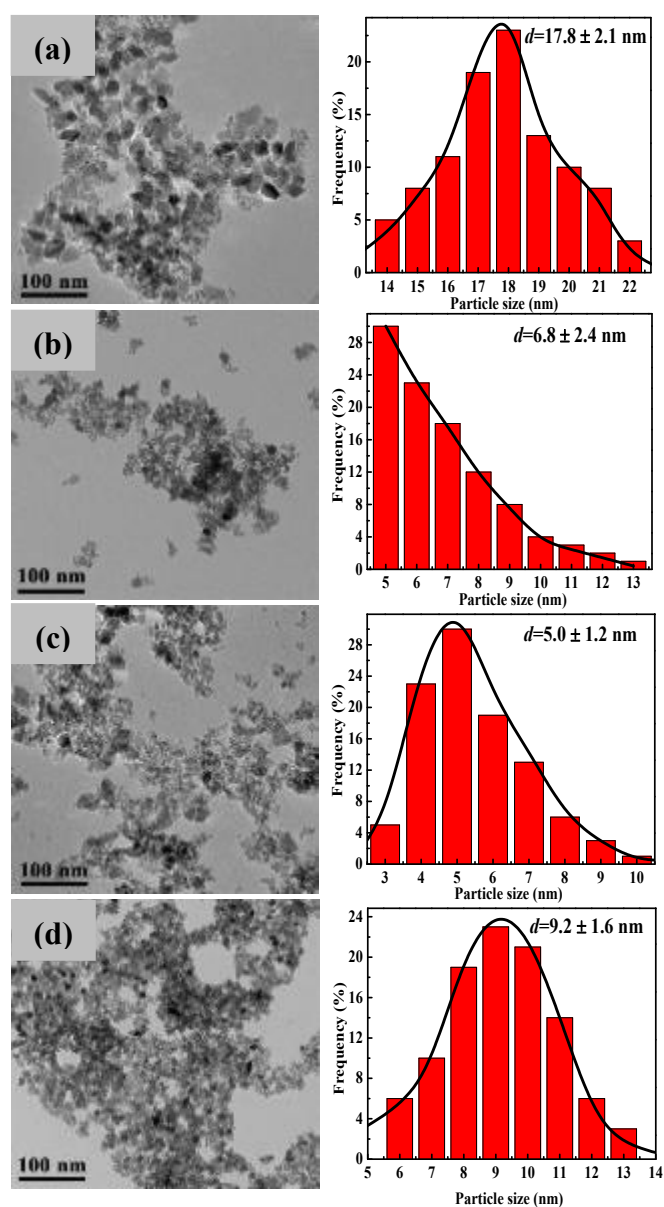

**Fig. S4.** TEM images and particle size distribution of the calcined FeMn catalysts: (a) FeMn-CTAB-0.15, (b) FeMn-CTAB-0.3, (c) FeMn-CTAB-0.6, (d) FeMn-CTAB-1.0.

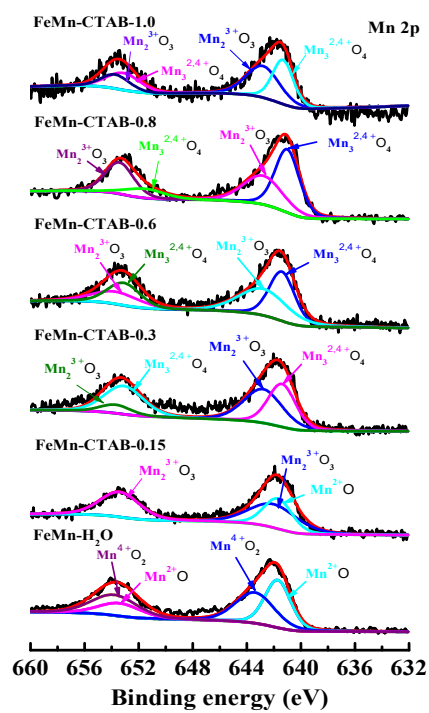

Fig. S5. The elaboration of Mn 2p results of the FeMn catalysts as-prepared.

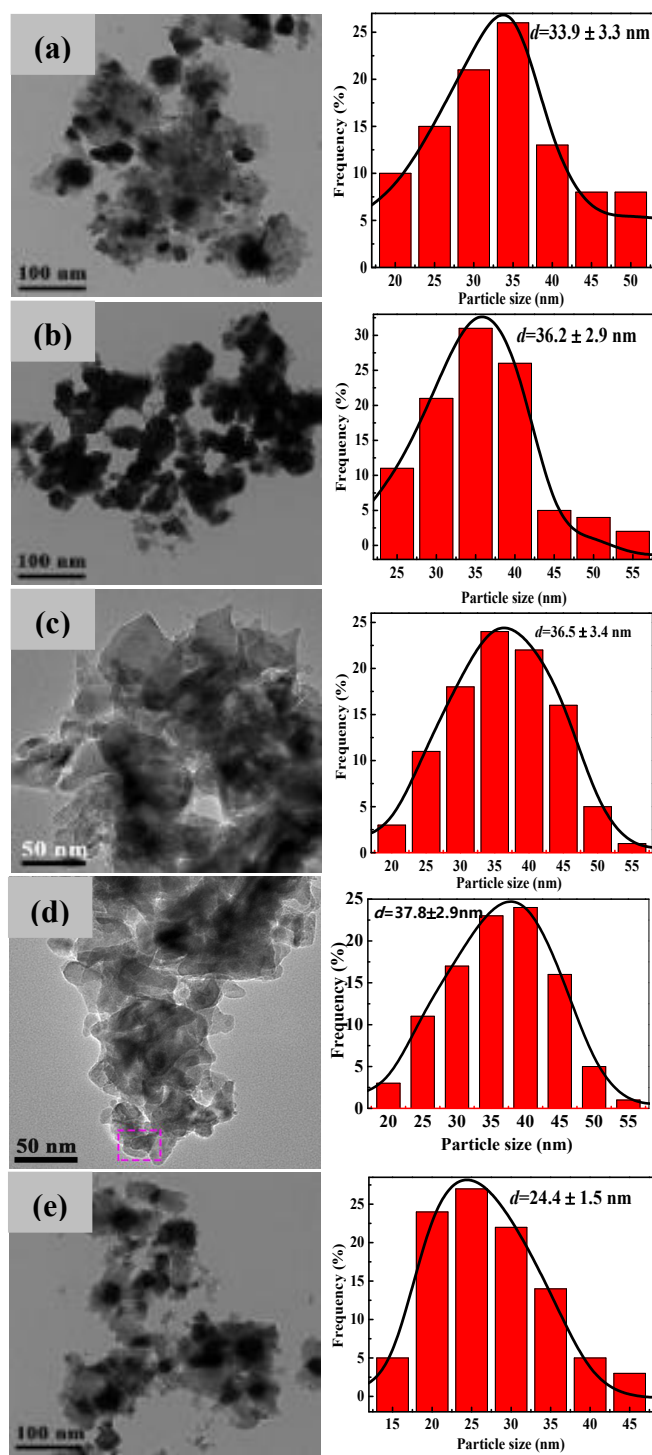

**Fig. S6.** TEM images and particle size distribution of the spent FeMn catalysts: (a) FeMn-0, (b) FeMn-CTAB-0.3, (c) FeMn-CTAB-0.6, (d) FeMn-CTAB-0.8 (e) FeMn-CTAB-1.0.

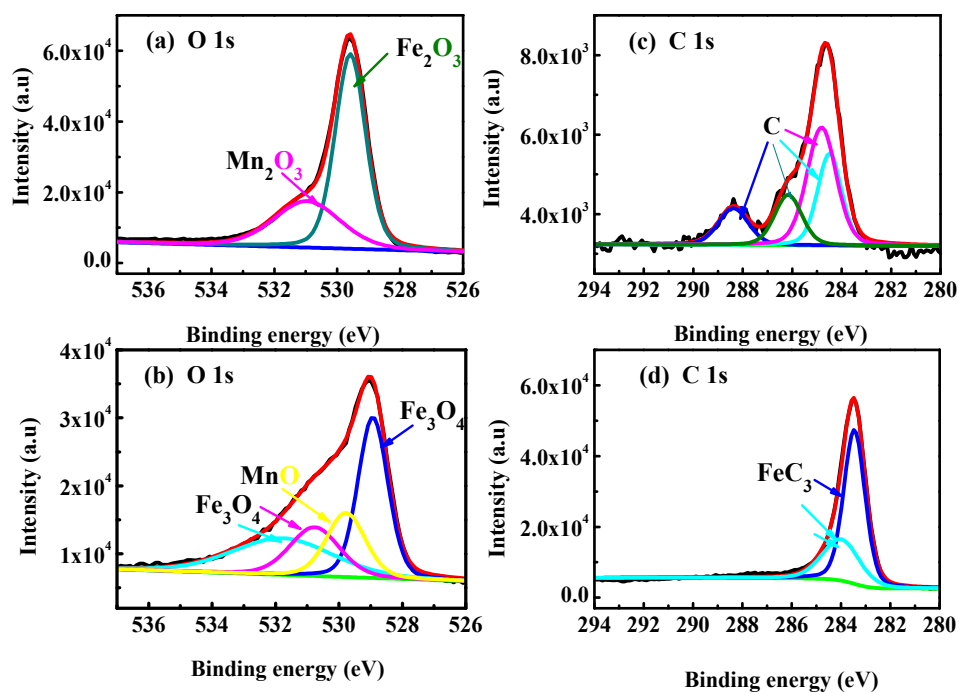

Fig. S7. The elaboration of the FeMn-CTAB-0.8: O 1s (a) Calcined sample, (b) Spent sample; C 1s (c) Calcined sample, (d) Spent sample.

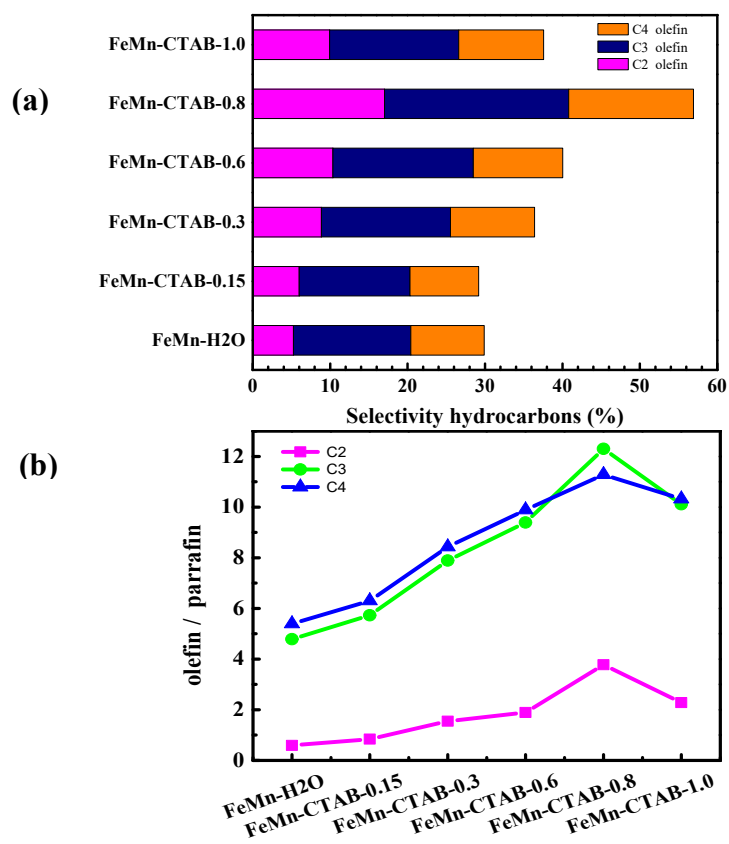

Fig. S8. (a) C<sub>2</sub>-C<sub>4</sub>olefins s selectivity at TOS=60 h, (b) Ration of olefin to paraffin in C<sub>2</sub>-C<sub>4</sub>hydrocarbons as a function of time.

Light olefins may have a very low tendency for secondary reactions except for ethylene.<sup>[1,2]</sup> As the Fig. S7a shown, the selectivity of  $C_2^=$  of 5.62 % (molar fraction) less than that of  $C_3^=$  (14.99 %) and  $C_4^=$  (9.61 %) for FeMn- $H_2O$ , which might be caused by more ethenes than the other alkenes are reabsorbed onto the active site to initiate a new chain growth reaction. Similar to the FeMn-CTAB catalysts. On the other hand, Fig. S8b shows ethenes exhibited more prone to hydrogenation than propylenes and butylenes, the O/P value arrived to maximum for FeMn-CTAB-0.8, suggesting the suppression of the  $H_2$  absorption and olefin readsorption. As a result, more light olefins were produced for the Mn-promoted Fe catalyst.

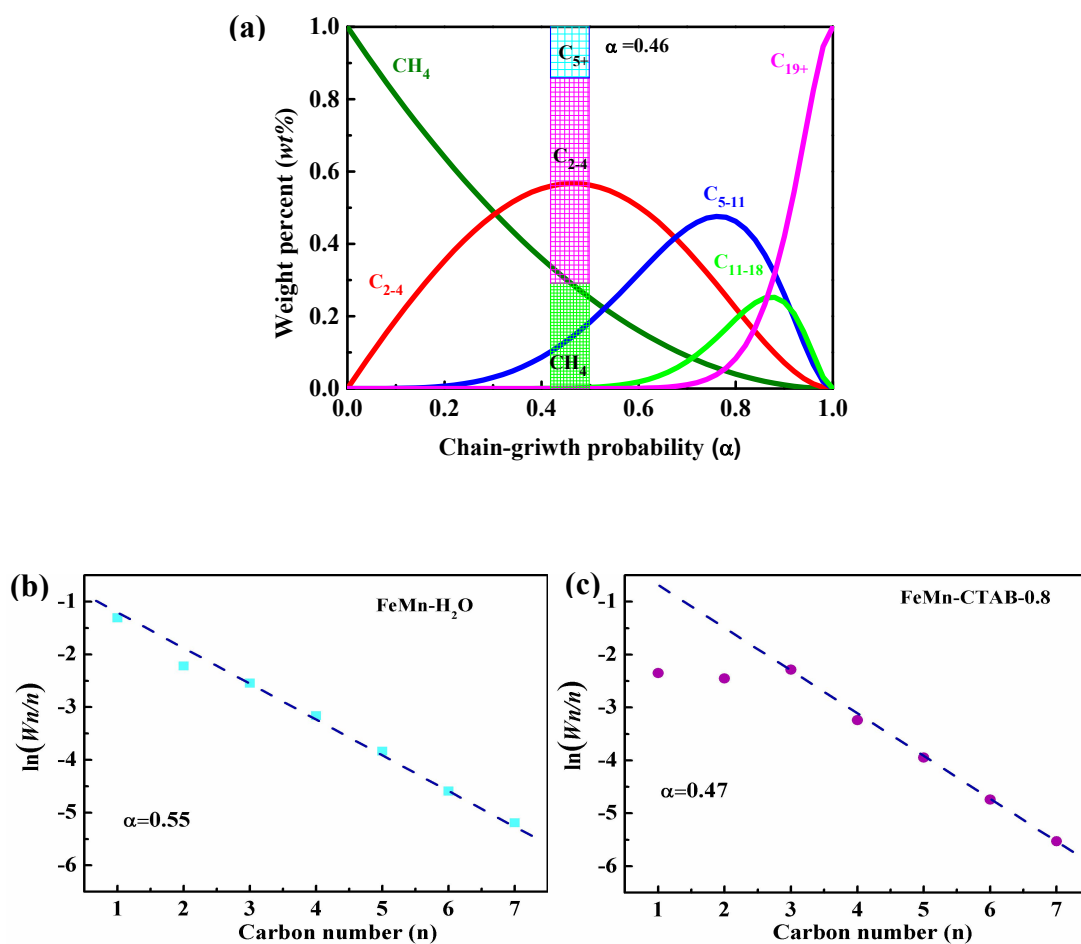

**Fig. S9.** (a) Product distribution according to the Anderson–Schulz–Flory (ASF) model, (b)-(c) Typical product plots ( $\ln(W_n/n)$  versus  $n$ ) obtained using our FeMn catalyst synthesized with different amount of CTAB .Catalysts were *in-situ* reduced at 400 °C for 12 h and tested at 320 °C, 1.0 MPa, GHSV=4200  $h^{-1}$ ,  $H_2/CO=1.5(v/v)$ .



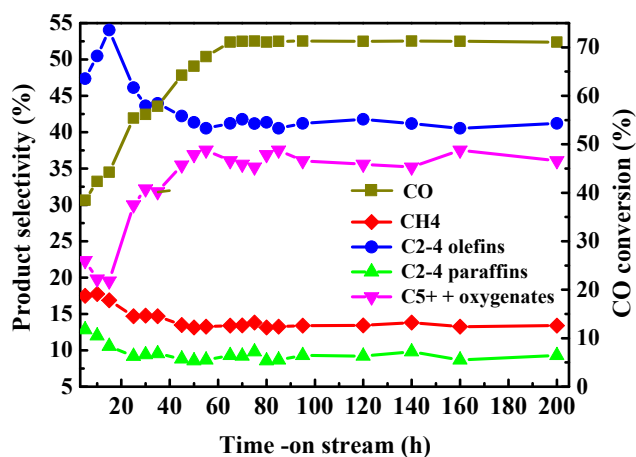

**Fig. S10.** Evaluation of the long-term stability of FeMn-CTAB catalyst.

**Table S1.** Elemental analysis, surface areas, pore parameters and particles size for FeMn catalysts with different addition of CTAB.

| Catalysts             | XRF   | EDS   | XPS           | BET                 | Pore  | Pore                 | Crystallite       |
|-----------------------|-------|-------|---------------|---------------------|-------|----------------------|-------------------|
|                       |       |       |               | Surface area        | Size  | Volume               | Size <sup>a</sup> |
|                       |       |       | <i>Atom %</i> | (m <sup>2</sup> /g) | (nm)  | (cm <sup>3</sup> /g) | (nm)              |
| FeMn-H <sub>2</sub> O | 0.103 | 0.104 | 0.139         | 73.220              | 7.828 | 0.235                | 18.1              |
| FeMn-CTAB-0.15        | 0.091 | 0.088 | 0.147         | 105.490             | 7.820 | 0.260                | 12.3              |
| FeMn-CTAB-0.3         | 0.091 | 0.092 | 0.170         | 123.567             | 7.833 | 0.300                | 7.2               |
| FeMn-CTAB-0.6         | 0.092 | 0.091 | 0.129         | 127.368             | 7.816 | 0.293                | 7.1               |
| FeMn-CTAB-0.8         | 0.081 | 0.079 | 0.119         | 135.652             | 6.573 | 0.303                | 6.1               |
| FeMn-CTAB-1.0         | 0.090 | 0.088 | 0.152         | 118.080             | 7.815 | 0.298                | 9.1               |

<sup>a</sup> Calculated from the Debye–Scherrer equation for hematite Fe<sub>2</sub>O<sub>3</sub>.

**Table S2.** Peak areas of manganese and iron oxides for FeMn catalysts in H<sub>2</sub>-TPR profiles.

| Catalysts             | T    | Peak | T    | Peak | T    | Peak | T    | Peak |
|-----------------------|------|------|------|------|------|------|------|------|
|                       | (°C) | Area | (°C) | Area | (°C) | Area | (°C) | Area |
| FeMn-H <sub>2</sub> O | N.A  | N.A  | 366  | 38   | 514  | 28   | 576  | 13   |
| FeMn-CTAB-0.15        | 326  | 20   | 359  | 17   | 510  | 36   | 613  | 36   |
| FeMn-CTAB-0.3         | 330  | 27   | 370  | 14   | N.A  | N.A  | 609  | 56   |
| FeMn-CTAB-0.6         | 330  | 25   | 363  | 13   | N.A  | N.A  | 598  | 52   |
| FeMn-CTAB-0.8         | 326  | 35   | 355  | 10   | N.A  | N.A  | 595  | 57   |
| FeMn-CTAB-1.0         | 328  | 29   | 360  | 14   | N.A  | N.A  | 597  | 58   |

**Table S3.** Peak areas of medium strong base and strong base for FeMn catalysts.

| Catalysts             | Temperature | Peak Area | Temperature | Peak Area |
|-----------------------|-------------|-----------|-------------|-----------|
|                       | (°C)        |           | (°C)        |           |
| FeMn-H <sub>2</sub> O | 277         | 60        | 452         | 139       |
| FeMn-CTAB-0.15        | 267         | 95        | 471         | 216       |
| FeMn-CTAB-0.3         | 259         | 99        | 476         | 246       |
| FeMn-CTAB-0.6         | 254         | 110       | 483         | 309       |
| FeMn-CTAB-0.8         | 244         | 183       | 489         | 440       |
| FeMn-CTAB-0.10        | 227         | 262       | 493         | 517       |

**Table S4.** XPS binding energies and concentrations for FeMn catalysts.

| Catalysts             | Binding energies(eV) and concentration (in atomic %) |       |           |      |        |       |
|-----------------------|------------------------------------------------------|-------|-----------|------|--------|-------|
|                       | Fe 2p 3/2                                            | (%)   | Mn 2p 3/2 | (%)  | O1s    | (%)   |
| FeMn-H <sub>2</sub> O | 710.80                                               | 27.21 | 642.10    | 3.79 | 529.90 | 53.12 |
| FeMn-CTAB-0.15        | 710.42                                               | 25.28 | 641.73    | 3.72 | 529.74 | 47.58 |
| FeMn-CTAB-0.3         | 710.53                                               | 24.80 | 641.70    | 4.21 | 529.74 | 47.75 |
| FeMn-CTAB-0.6         | 710.60                                               | 27.36 | 641.60    | 3.52 | 529.78 | 49.22 |
| FeMn-CTAB-0.8         | 710.54                                               | 29.04 | 641.28    | 3.47 | 529.60 | 50.78 |
| FeMn-CTAB-1.0         | 710.7                                                | 26.97 | 641.75    | 4.11 | 529.70 | 48.30 |

**Table S5.** Catalytic performance of the FeMn catalyst with different ratio Mn/Fe <sup>a</sup>.

| Catalysts                                                                                              | FeMn-0 | FeMn-0.06 | FeMn-0.10 | FeMn-0.15 | FeMn-0.20 |
|--------------------------------------------------------------------------------------------------------|--------|-----------|-----------|-----------|-----------|
| CO conversion (C %)                                                                                    | 86.63  | 30.92     | 24.51     | 28.41     | 42.36     |
| FTY <sup>b</sup> (10 <sup>-6</sup> mol <sub>co</sub> ·g <sub>Fe</sub> <sup>-1</sup> ·s <sup>-1</sup> ) | 9.95   | 6.65      | 5.02      | 5.11      | 5.24      |
| CO <sub>2</sub> selectivity (C %)                                                                      | 38.61  | 11.96     | 17.94     | 19.34     | 27.19     |
| Products selectivity (% C, CO <sub>2</sub> -free)                                                      |        |           |           |           |           |
| CH <sub>4</sub>                                                                                        | 13.31  | 20.66     | 21.25     | 24.0      | 16.74     |
| C <sub>2</sub>                                                                                         | 16.58  | 22.62     | 22.09     | 19.91     | 20.30     |
| C <sub>3</sub>                                                                                         | 21.60  | 25.96     | 27.02     | 28.37     | 24.94     |
| C <sub>4</sub>                                                                                         | 13.77  | 16.44     | 19.23     | 21.44     | 16.99     |
| C <sub>2-4</sub> olefins                                                                               | 39.80  | 58.16     | 61.21     | 53.79     | 49.99     |
| C <sub>2-4</sub> paraffins                                                                             | 12.14  | 6.85      | 7.13      | 15.92     | 12.20     |
| C <sub>5+</sub> + oxygenates <sup>d</sup>                                                              | 34.74  | 14.32     | 10.41     | 6.29      | 21.03     |
| olefin/paraffin ratio                                                                                  |        |           |           |           |           |
| C <sub>2</sub>                                                                                         | 1.21   | 5.38      | 4.99      | 1.06      | 1.71      |
| C <sub>3</sub>                                                                                         | 6.33   | 12.10     | 13.03     | 6.89      | 7.71      |
| C <sub>4</sub>                                                                                         | 7.14   | 11.43     | 11.68     | 7.08      | 8.05      |
| C <sub>2-4</sub>                                                                                       | 3.28   | 8.49      | 8.59      | 3.38      | 4.08      |

<sup>a</sup> Catalysts were *in-situ* reduced at 400 °C for 12 h and tested at 320 °C, 1.0 MPa, GHSV=4200 h<sup>-1</sup>, H<sub>2</sub>/CO=1.5(v/v); CTAB/Fe=0.8 (mol/mol) in the preparation.

<sup>b</sup> FTY (Iron time yield) mol of CO converted to hydrocarbons (excluding CO<sub>2</sub>) per time (s) per weight of iron (g).

<sup>d</sup> C<sub>5+</sub> is hydrocarbon which was analyzed online by gas chromatograph (GC); Oxygenates is from 160 °C hot trap and -1 °C cooling trap.

**Table S6.** Catalytic performance of the FeMn catalyst with different GHSV <sup>a</sup>.

| GHSV<br>h <sup>-1</sup> | CO         | CO <sub>2</sub> | hydrocarbon selectivity (C mol %,CO <sub>2</sub> -free) |                  |                  |                         | O/P <sup>c</sup> |
|-------------------------|------------|-----------------|---------------------------------------------------------|------------------|------------------|-------------------------|------------------|
|                         | conversion | selectivity     | CH <sub>4</sub>                                         | C <sub>2-4</sub> | C <sub>2-4</sub> | C <sub>5+</sub>         |                  |
|                         | (C mol %)  | (C mol %)       |                                                         | olefins          | paraffins        | Oxygenates <sup>d</sup> |                  |
| 3600                    | 47.25      | 22.59           | 18.32                                                   | 56.58            | 8.72             | 16.38                   | 6.49             |
| 4200                    | 16.95      | 10.63           | 21.52                                                   | 61.99            | 6.75             | 9.74                    | 9.18             |
| 4800                    | 18.97      | 7.49            | 21.39                                                   | 55.65            | 6.48             | 16.48                   | 8.59             |
| 6000                    | 28.21      | 9.65            | 20.39                                                   | 50.40            | 6.39             | 22.82                   | 7.89             |

<sup>a</sup> Catalysts were *in-situ* reduced at 400 °C for 12 h and tested at 320 °C, 1.0 MPa, H<sub>2</sub>/CO=1.5(v/v), at initial reaction stages.

<sup>b</sup> CTAB/Fe=0.8, Mn/Fe=0.10 (mol/mol).

<sup>c</sup> O/P represents the molar ratio of olefin to paraffin in the C<sub>2</sub>-C<sub>4</sub> range hydrocarbons.

<sup>d</sup> C<sub>5+</sub> is hydrocarbon which was analyzed online by gas chromatograph (GC); Oxygenates is from 160 °C hot trap and -1 °C cooling trap.

## References

- [1] X. Zhang, Y. Liu, G.-Q. Liu, K. Tao, Q. Jin, F.-Z. Meng, D. Wang, N. Tsubaki, *Fuel* **2012**, *92*, 122-129.
- [2] J.-B. Li, H.-F. Ma, H.-T. Zhang, Q.-W. Sun, W.-Y. Ying, D.-Y. Fang, *Acta Phys.-Chim. Sin.* **2014**, *30*, 1932-1940
